# Supplementary material
Source: Springer Nature journal article supplement (https://www.springermedizin.de/resource/supplementary/12885_2008_1166_MOESM9_ESM.pdf/9471284)

**A – Liver (week 1)**

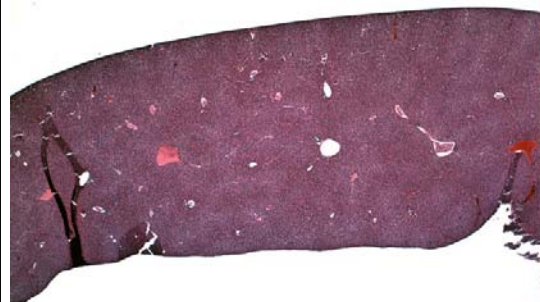

**B – Liver (week 2)**

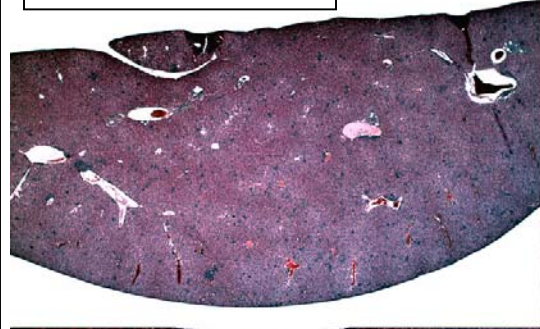

**C – Liver (week 6)**

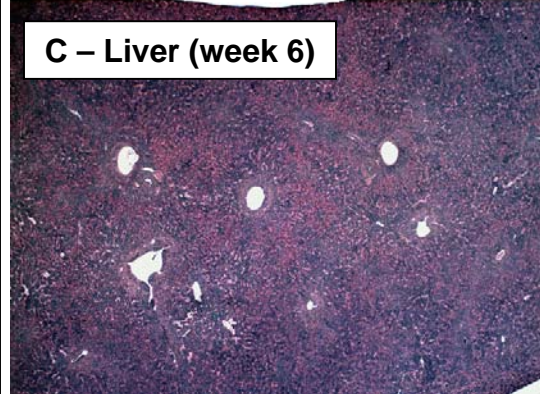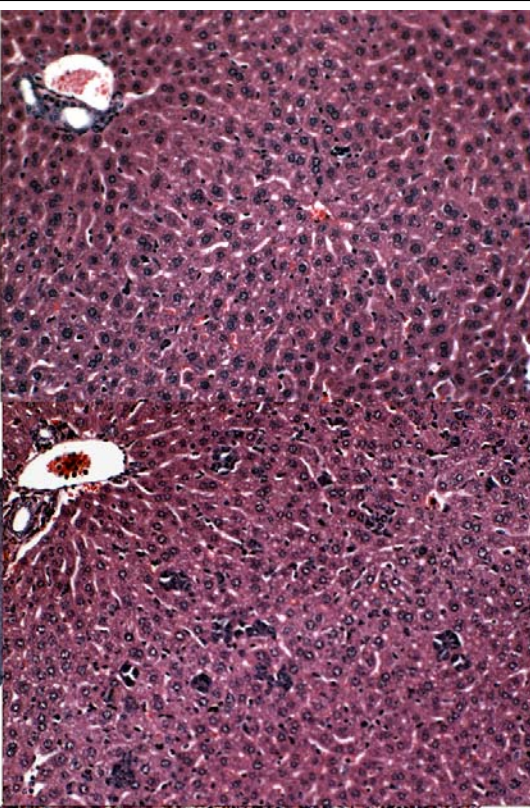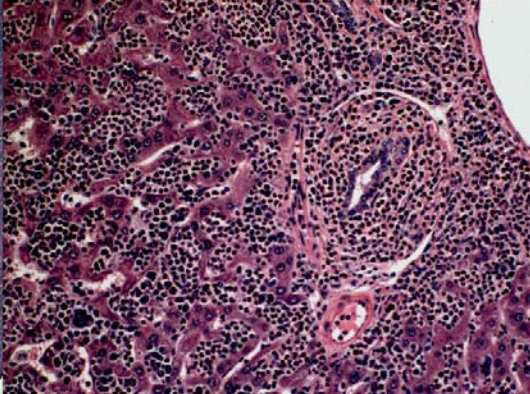

Supplement: MOESM9 [file 9471284]
